# Supplementary material for: Effects of Shade and Planting Methods on the Growth of Heracleum moellendorffii and Adenophora divaricata in Different Soil Moisture and Nutrient Conditions
Source: MDPI journal article supplement (doi:10.3390/plants10102203), 2021-10-17
Supplement: s1 [file s1]

# Supplementary Materials

Table S1. P-values of two-way ANOVA for treatment effects and interaction on growth characteristics of unfertilized and fertilized *Heracleum moellendorffii* and *Adenophora divaricata*.

Significant p-values are written in bold font.

| Parameter            | Factor           | <i>Heracleum moellendorffii</i> |                  | <i>Adenophora divaricata</i> |                  |
|----------------------|------------------|---------------------------------|------------------|------------------------------|------------------|
|                      |                  | Unfertilized                    | Fertilized       | Unfertilized                 | Fertilized       |
| Aboveground biomass  | Planting         | 0.854                           | <b>0.044</b>     | <b>0.002</b>                 | <b>&lt;0.001</b> |
|                      | Shade            | 0.521                           | <b>0.054</b>     | <b>0.007</b>                 | <b>0.023</b>     |
|                      | Planting × Shade | 0.070                           | 0.779            | <b>0.051</b>                 | 0.593            |
| Production           | Planting         | 0.968                           | 0.468            | 0.257                        | <b>&lt;0.001</b> |
|                      | Shade            | <b>0.026</b>                    | 0.711            | <b>0.039</b>                 | 0.073            |
|                      | Planting × Shade | 0.542                           | 0.820            | 0.745                        | 0.352            |
|                      | Shade            |                                 |                  |                              |                  |
| Leaf specific weight | Planting         | 0.102                           | 0.637            | <b>0.024</b>                 | 0.262            |
|                      | Shade            | <b>0.051</b>                    | 0.699            | 0.166                        | 0.128            |
|                      | Planting × Shade | 0.624                           | 0.515            | 0.097                        | 0.070            |
|                      | Shade            |                                 |                  |                              |                  |
| Height               | Planting         | 0.707                           | 0.245            | 0.523                        | 0.140            |
|                      | Shade            | <b>&lt;0.001</b>                | <b>&lt;0.001</b> | 0.092                        | 0.440            |
|                      | Planting × Shade | 0.109                           | 0.089            | 0.894                        | 0.857            |
|                      | Shade            |                                 |                  |                              |                  |

Table S2. P-values of two-way ANOVA for treatment effects and interaction on growth characteristics of *Heracleum moellendorffii* and *Adenophora divaricata* grown in low and high soil moisture. Significant p-values are written in bold font.

| Parameter           | Factor           | <i>Heracleum moellendorffii</i> |               | <i>Adenophora divaricata</i> |               |
|---------------------|------------------|---------------------------------|---------------|------------------------------|---------------|
|                     |                  | Low moisture                    | High moisture | Low moisture                 | High moisture |
| Aboveground biomass | Planting         | 0.235                           | 0.063         | 0.716                        | 0.441         |
|                     | Shade            | 0.545                           | 0.503         | 0.969                        | 0.620         |
|                     | Planting × Shade | 0.546                           | 0.406         | 0.473                        | 0.091         |
|                     |                  |                                 |               |                              |               |
| Belowground biomass | Planting         | 0.078                           | 0.147         | <b>0.027</b>                 | 0.089         |
|                     | Shade            | 0.556                           | 0.581         | 0.307                        | 0.548         |
|                     | Planting × Shade | 0.669                           | 0.624         | <b>&lt;0.001</b>             | 0.639         |
|                     |                  |                                 |               |                              |               |
| Height              | Planting         | <b>0.018</b>                    | 0.069         | 0.679                        | 0.485         |
|                     | Shade            | 0.129                           | <b>0.017</b>  | 0.075                        | 0.598         |
|                     | Planting × Shade | 0.625                           | 0.227         | 0.478                        | 0.886         |
|                     |                  |                                 |               |                              |               |
